# Supplementary material
Source: PubMed Central journal article supplement (PMC8653144)

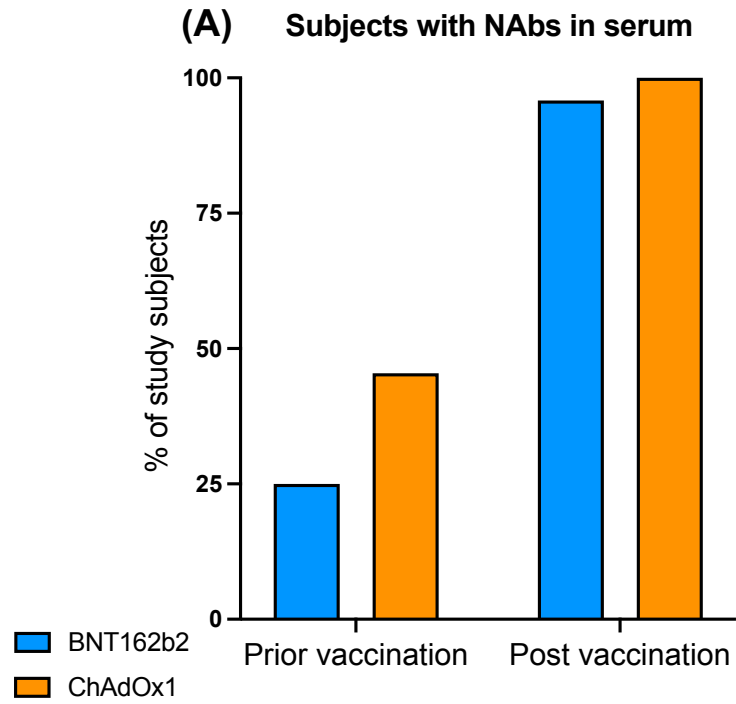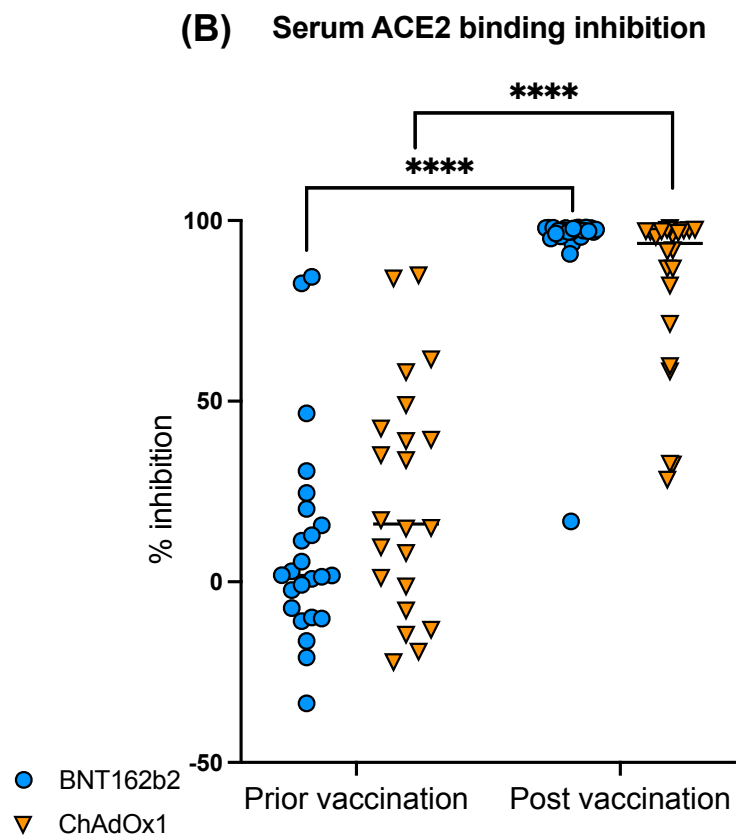

Supplement: ALL-77-304-s001.pdf [file ALL-77-304-s001.pdf]
